# 1 **Rethinking root-shoot growth dynamics**

2 David Robinson

3 School of Biological Sciences, University of Aberdeen, Aberdeen AB24 3UU, UK

4 Correspondence: [david.robinson@abdn.ac.uk](mailto:david.robinson@abdn.ac.uk)

5

## 6 **Abstract**

7 Using a simple plant growth model based on the logistic equation I re-evaluate how biomass  
8 allocation between roots and shoots articulates dynamically with the rate of whole-plant  
9 biomass production. Defined by parameters reflecting lumped physiological properties, the  
10 model constrains roots and shoots to grow sigmoidally over time. From those temporal  
11 patterns detailed trajectories of allocation and growth rate are reconstructed. Sigmoid growth  
12 trajectories of roots and shoots are incompatible with the dominant ‘functional equilibrium’  
13 model of adaptive allocation and growth often used to explain plants’ responses to nutrient  
14 shortage and defoliation. Anything that changes the differential rates of growth between roots  
15 and shoots will automatically change allocation and, unavoidably, change whole-plant growth  
16 rate. Biomass allocation and whole-plant growth rate are not independent traits. Allocation  
17 and growth rate have no unique relationship to one another but can vary across a wide  
18 spectrum of possible relationships. When root-shoot allocation seems to respond to the  
19 environment it is likely to be a secondary illusory consequence of other primary responses  
20 such as localised root proliferation in soil or leaf expansion within canopy gaps. Changes in  
21 root-shoot allocation cannot themselves compensate directly for an impairment of growth rate  
22 caused by an external factor such as nutrient shortage or defoliation; therefore, such changes  
23 cannot be ‘adaptive’.

24 'The reasons are so simple they often escape notice.' (James 2012, p. 6).

## 25 **Introduction: Handcuffing an octopus**

26 A doyen of plant growth analysis once told me that trying to understand how a plant's  
27 biomass is allocated between roots and shoots while it simultaneously produces more biomass  
28 is like 'trying to handcuff an octopus': no sooner do you pin down whole-plant growth rate  
29 than allocation slips out of your grasp; nail allocation and you find growth rate has hidden  
30 itself under a rock. At first sight it may seem unlikely that this is so, given that the production  
31 of biomass and its allocation among different organs are such well-studied phenomena.  
32 Nevertheless, some surprisingly simple aspects of how these processes are related have been  
33 overlooked or misunderstood.

34 Thinking on this subject is dominated by Brouwer's 'functional equilibrium' concept of plant  
35 growth (Brouwer 1962). Admirably reviewed by Poorter & Nagel (2000), Brouwer's theory  
36 was encapsulated thus: '...plants shift their allocation towards shoots if the carbon gain of the  
37 shoot is impaired by a low level of above-ground resources, such as light and CO<sub>2</sub> [and also if  
38 the plant is defoliated: DR]. Similarly, plants shift allocation towards roots at a low level of  
39 below-ground resources, such as nutrients and water. These shifts could be seen as adaptive,  
40 as they enable the plant to capture more of those resources that most strongly limit plant  
41 growth' and later: '...implicit in this model is that a plant allocates its biomass in such a  
42 manner that its growth rate is maximal under the given environmental conditions.' This  
43 intuitively attractive idea underpins many plant growth models (see Wilson 1988; Thornley  
44 1998).

45 The key assumption is that there are optimum allocations of biomass at which the rate of  
46 biomass production is maximised. But if the key assumption is true, why has it apparently  
47 been impossible for anyone to plot measurements of whole-plant growth rate against some

48 measure of allocation to see the former maximised at a certain value (or values) of the latter?

49 Why is the relationship between allocation and growth rate so enduringly enigmatic?

50 Part of the problem is that few relevant experiments have followed root and shoot growth for

51 long enough and in enough detail to reveal the full dynamics of biomass allocation and its co-

52 variation with biomass production rates. Complex growth models have not revealed, or been

53 used to reveal, just how biomass allocation articulates dynamically with growth rate. Maybe it

54 seems too trivial an issue to attract the firepower of a full-blown simulation model, or the

55 models are just too specific to clarify what is, in my view, a very general and important

56 relationship.

57 Whatever the reasons, we need an alternative approach to resolve how root-shoot allocation

58 and whole-plant growth rate co-vary. That which I propose here takes its cue not from plant

59 physiology, but from population biology, a field dominated by simple phenomenological

60 models rather than mechanistically realistic ones.

## 61 **Simplifying the complex**

### 62 *Preamble*

63 The starting point for this re-think is the seemingly trivial observation that root and shoot

64 growth change with time in both absolute terms and relative to one another, and that those

65 changes can to a reasonable approximation be described mathematically without worrying too

66 much about the fine details.

67 Trajectories of root and shoot growth can approximate simple linear or exponential functions

68 of time in young plants (the subjects of almost all the influential experiments on root-shoot

69 allocation) or they can be described with ever increasing statistical precision by whatever

70 polynomial or other curve best fits the data. But the most general temporal pattern of root and  
71 shoot growth is a sigmoid trajectory.

72 All plants grow sigmoidally over much of their lives even if, in the short-term and when  
73 young, they might seem to grow linearly or exponentially. If they do, then they cannot do so  
74 forever. Models using equations describing mechanisms of light interception, nutrient uptake,  
75 organ formation and resource allocation (for example, Brown *et al.* 2019) always predict  
76 approximately sigmoid trajectories of biomass change. Biomass production eventually  
77 reaches a ceiling of one sort or another. That ceiling may be only a transient halt before  
78 regrowth or reproduction occurs, or it can be a prelude to senescence and death. The timespan  
79 of a sigmoid trajectory will range from days or weeks for a fast-growing short-lived annual  
80 species, to decades or centuries for a slow-growing long-lived tree. A sigmoid growth pattern  
81 is as close to a universal biological principle as any (West *et al.* 2001).

82 If separate trajectories of roots and shoots are constructed, they can be combined to calculate  
83 biomass allocation between roots and shoots along with the growth rate of the whole plant  
84 (Robinson & Peterkin 2019). This allows the co-variation between biomass allocation and  
85 production to be visualised directly in ways that existing models or experiments have not. If  
86 the supposed ‘adaptive’ responses of allocation referred to above are real, then they should  
87 appear in such visualisations.

88 There are strong arguments that the root-shoot dichotomy is just too simple to capture the  
89 reality of plant growth. At least three classes of structures – leaves, stems and roots – are  
90 needed to reflect their roles in above- and below-ground resource capture as well as  
91 mechanical support of a vegetative plant (Poorter & Nagel 2000; Poorter *et al.* 2015).

92 Biomass allocation in a reproductive angiosperm would also need to account for flowering  
93 stalks, sexual organs, flowers, fruit and seed. And distinguishing coarse roots from fine roots

94 reflects more faithfully what those structures contribute to the life of their parent plant (Chen  
95 *et al.* 2019). While recognising that it caricatures the behaviour of real plants, I have retained  
96 the classical root-shoot division because the loss of realism is offset by gains in clarity and  
97 generality.

### 98 *Producing biomass*

99 Incremental changes in root or shoot biomass between two successive times,  $t_1$  and  $t_2$ , and  
100 which form part of a sigmoid trajectory can be described by an equation such as the logistic.  
101 A mainstay of population modelling ('probably the simplest nonlinear equation one could  
102 write': May 1974a), the logistic equation can be written as:

$$103 \quad Y_{t_2} = Y_{t_1}(t_2 - t_1) \left[ 1 + r \left( 1 - \frac{Y_{t_1}}{Y_{max}} \right) \right] \quad (1)$$

104 where  $Y$  is root ( $R$ ) or shoot ( $S$ ) biomass (in terms of dry weight) of an individual plant,  $Y_{max}$   
105 the asymptotic maximum value of  $Y$ ,  $t$  time, and  $r$  the intrinsic growth rate of  $Y$  (with units of  
106 [time]<sup>-1</sup>). If the time interval  $t_2 - t_1$  is sufficiently short and many such successive intervals are  
107 assumed, the difference equation, eqn. (1), approximates a continuous estimate of  $Y$  over  
108 time. There is nothing special about eqn. (1). Any function that produces a sigmoid trajectory  
109 of  $Y$  with time could be used for this purpose although the algebraic details will differ.

110 For simplicity, I assume that  $Y_{max}$  and  $r$  are independent of one another, and root-specific  
111 values of  $Y_{max}$  and  $r$  independent of those for shoots. In real plants, root and shoot growth and  
112 other physiological processes are interdependent to some extent, and the activities of one  
113 plant part feeds back to influence the activities of another. Roots and shoots are connected by  
114 common vascular systems and the continual exchange between them of numerous resources  
115 and signals help coordinate their respective activities. Experiments on young seedlings often  
116 give the impression that roots and shoots do grow synchronously. It is a mistake, however, to

117 suppose this the norm. One look at the disparity between the above- and belowground  
118 phenologies of numerous species dispels the notion of there always being close synchrony  
119 between root and shoot growth (Abramoff & Finzi 2015; Makoto *et al.* 2020).

120 Whole-plant biomass ( $W$ ) at any time is simply the sum of  $R$  and  $S$  at that time, and its value  
121 depends on how eqn. (1) is parameterised separately for roots and shoots in terms of  $r$  and  
122  $Y_{max}$  values. In addition, when using eqn. (1) in the absence of experimental data to which the  
123 curve can be fitted (for example, Robinson & Peterkin 2019), it is necessary to specify initial  
124 values of root and shoot mass ( $R_0$  and  $S_0$ ). It is more likely than not that initial root and shoot  
125 masses will differ, so that is what I assume here.

126 The absolute growth rate (AGR, with units of [mass] [time]<sup>-1</sup>) of root or shoot biomass at any  
127 point is the first derivative of eqn. (1) with respect to time, so that  $AGR = rY(1 - Y / Y_{max})$   
128 where, again,  $r$ ,  $Y$  and  $Y_{max}$  are specific for roots and shoots.

129 This definition of AGR says that the instantaneous growth rates of roots and shoots depend on  
130 the values of both  $r$  and  $Y_{max}$ . The influence of  $r$  on growth rate is greatest when  $Y$  is small  
131 compared with  $Y_{max}$ , that is, when  $Y$  is much smaller than  $Y_{max}$  AGR approximates  $rY$ .

132 Conversely, when  $Y$  is close to its upper limit  $r$  can have little influence on growth rate  
133 because then AGR is virtually zero whatever the value of  $r$ . In other words, the value of  $r$  has  
134 most influence on young plants and none on old plants.  $Y_{max}$  has negligible influence on  
135 young plants. Its main influence is to determine how long it takes  $Y$  to reach its ultimate  
136 value: the bigger  $Y_{max}$ , the longer it takes.  $r$  and  $Y_{max}$  exert their most powerful joint influences  
137 on root or shoot growth rate somewhere in the middle of their sigmoid trajectories.

138 The growth rate of a whole plant or of its component parts is usually expressed as its relative  
139 (or specific) growth rate (RGR, with units of [time]<sup>-1</sup>). Once values of  $R$  and  $S$  have been

140 calculated by eqn. (1) it is straightforward to calculate RGR separately for roots, shoots and  
141 for the whole plant between successive time intervals  $t_1$  and  $t_2$  (Hunt 1982, p. 18).

142 Whole-plant RGR is:

$$143 \quad \text{RGR} = \frac{\ln(R_{t_2} + S_{t_2}) - \ln(R_{t_1} + S_{t_1})}{t_2 - t_1} \quad (2)$$

144 where, as before,  $R$  and  $S$  are root and shoot biomasses, respectively. Root and shoot RGRs  
145 are calculated in the same way, leaving out the shoot or root biomasses from eqn. (2), as  
146 appropriate. Again, if  $t_2 - t_1$  is short and there are many such intervals eqn. (2) approximates a  
147 continuous estimate of RGR with respect to time.

148 RGR of the whole plant is also defined instantaneously as  $\text{AGR}/W$ . From the above definition  
149 of AGR,  $\text{RGR} = r (1 - Y / Y_{\max})$ , where  $Y = W = R + S$  as calculated by eqn. (1),  $Y_{\max} = W_{\max} =$   
150  $R_{\max} + S_{\max}$ , and  $r$  in this case is the weighted mean of the  $r$  values for roots and shoots.  
151 Therefore, RGR equals  $r$  at zero biomass ( $Y = 0$ ) or, equivalently, at zero time. The maximum  
152 possible RGR is  $r$ . RGRs of roots and shoots inevitably decline over time as  $Y$  gets closer to  
153  $Y_{\max}$ , unless that progression is interrupted by, for example, sudden biomass loss in a  
154 defoliation event. Because whole-plant RGR is calculated from the combined trajectories of  $R$   
155 and  $S$ , it is not necessarily true that whole-plant RGR will always decline with time. The  
156 temporal trajectory of whole-plant RGR will depend on the values of  $r$  and  $Y_{\max}$  assumed for  
157 roots and shoots.

158 *Allocating biomass*

159 Root-shoot biomass allocation at any time is expressed most simply as the plant's root mass  
160 fraction (RMF):

$$161 \quad \text{RMF} = R / (R + S) \quad (3)$$

162 where  $R$  and  $S$  are each calculated separately by eqn. (1). Because, via eqn. (1), both  $R$  and  $S$   
163 are functions of time, so is RMF. RMF can have any value between 0 and 1, but physiological  
164 constraints limit it to somewhere within that range.  $\text{RMF} = 0.5$  indicates equal biomass  
165 allocation to roots and shoot; greater than 0.5 means more biomass is allocated to roots, and  
166 less than 0.5, the opposite. In most plants RMF is typically between 0.1-0.4 with a global  
167 median of 0.24 (based on 11217 data from 1208 species in Table S2 of Poorter *et al.* 2015),  
168 although the extremities of that database range from an RMF as small as 0.02 in *Manilkara*  
169 *bidentata* to one as large as 0.92 in *Picea abies*.

170 For a plant whose growth trajectory follows eqn. (1) to ‘adaptively’ change its root-shoot  
171 allocation of biomass it must change the RGRs of its roots, shoots or both (Brouwer 1962).  
172 Because  $\text{RGR} = r(1 - Y/Y_{\max})$ , that means changing  $r$ ,  $Y_{\max}$  or both. If root and shoot RGRs  
173 cannot change, allocation cannot deviate from its current trajectory. Of course, ‘changing  $r$   
174 and  $Y_{\max}$ ’ is just shorthand for the myriad molecular and genetic processes that regulate  
175 biomass production, notable recent examples of which include the nitrogen-induced increase  
176 in abundance of growth-regulating transcription factors (Swift *et al.* 2020) and the temporal  
177 dynamics of multiple QTL associated with RGR (Meyer *et al.* 2020). But for this exercise,  
178 such processes and their mechanisms need not be specified – fortunately for us.

179 Another simplification I make is to ignore the many complications thrown up by clonal or  
180 parasitic plants, plants that go into long periods of dormancy, interannual variations in the  
181 growth of long-lived plants, the influences of symbionts, and competing plants, to list just a  
182 few of the reasons why what follows aims ‘not at realism in detail, but rather at providing  
183 mathematical metaphors for broad classes of phenomena. Such models can be useful in  
184 suggesting interesting experiments or data collecting enterprises, or just in sharpening  
185 discussion’ (May 1974b, p. v) – *especially* in sharpening discussion.



## 186 Starting with some simple sigmoid trajectories

187 Let's start with a simple example to illustrate some basic points. I assume here that our plant  
188 grows with certain arbitrary values of  $r$  and  $Y_{max}$  for its roots and shoots: for roots  $r = 0.06$   
189 and  $Y_{max} = 30$ ; for shoots  $r = 0.1$  and  $Y_{max} = 50$ . Assume, again arbitrarily, that the initial root  
190 mass ( $R_0$ ) = 0.8 and the initial shoot mass ( $S_0$ ) = 1.2, so that the initial total plant mass = 2.  
191 The resulting growth trajectories are plotted in Fig. 1 over 100 time-steps.

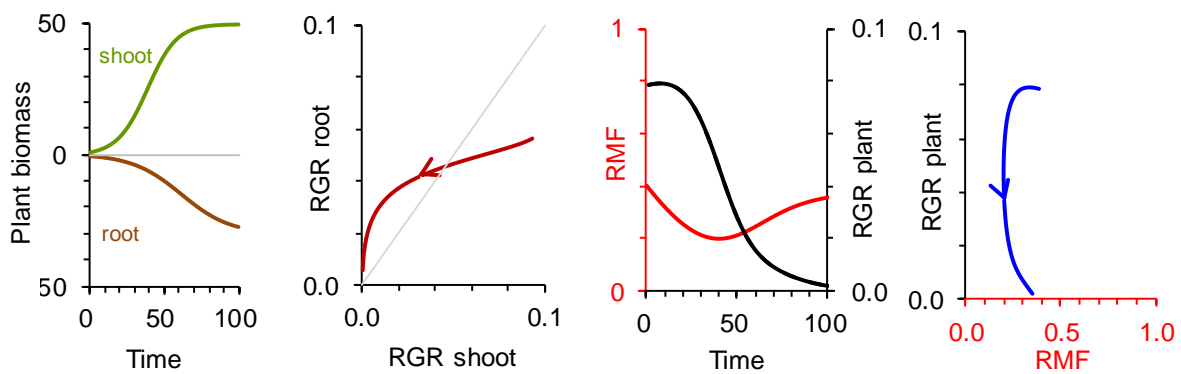

192  
193 Fig. 1. Trajectories of root and shoot biomass with time (eqn. (1)), root, shoot and whole-plant RGRs (eqn. (2)),  
194 and RMF (eqn. (3)). The curves in the third panel are plotted against each other in the fourth. Throughout, root  $r$   
195 = 0.06 and  $Y_{max} = 30$ , shoot  $r = 0.1$  and  $Y_{max} = 50$ . Initial root mass ( $R_0$ ) = 0.8 and initial shoot mass ( $S_0$ ) = 1.2.  
196 Arrows indicate temporal direction.

197 The sigmoid progressions of root and shoot masses generate continuously declining RGRs of  
198 roots and shoot. Shoot RGR initially exceeds that of roots, but these later reverse and each  
199 eventually declines towards zero. Because in this example root and shoot RGRs are always  
200 changing it is inevitable that root-shoot biomass allocation, as embodied in the root mass  
201 fraction, also changes continually. This change in RMF occurs in the absence of any external  
202 driver which makes RMF rise or fall.

203 The temporal trajectory of RMF in Fig. 1 reflects its 'ontogenetic drift' (Wilson 1988) or  
204 'apparent plasticity' (McConnaughay & Coleman 1999). Ontogenetic drift in biomass  
205 allocation arising from a disparity in growth rate between roots and shoots is possible even if

206 the parameters defining root and shoot growth rates, namely  $r$  and  $Y_{max}$ , are constant. A  
207 phenotype fixed in terms of how eqn. (1) is parameterised can still exhibit plasticity. The  
208 prospect of a plant adjusting its growth to maintain something like a steady root-shoot  
209 biomass allocation over time seems improbable if RMF is such an intrinsically labile  
210 quantity. It is true, however, that small temporal changes in RMF might be barely detectable  
211 in practice against the background variation among experimental replicates.

212 Towards the end of the time-course when neither root nor shoot biomass changes much  
213 (because each is close to its  $Y_{max}$ ) RMF approaches a steady value. Only if root and shoot  
214 RGRs are equal and constant will allocation stay constant over time. That will be a rare  
215 occurrence.

216 The corresponding whole-plant RGR in this example does not decline continually, unlike the  
217 RGRs of its component root and shoot masses. It initially increases slightly, reaching its  
218 maximum at  $t = 7$ , before then declining towards zero as roots and shoot approach their upper  
219 limits.

220 Plotting whole-plant RGR against RMF produces a co-trajectory that I doubt many of us  
221 would have predicted from existing theoretical knowledge or empirical evidence. As far as I  
222 know such a trajectory has yet to be discovered by any experiment, although by plotting  
223 partial RGR-RMF trajectories derived by fitting eqn. (1) to biomass measurements of 11  
224 herbaceous species Robinson & Peterkin (2019) hinted at what Fig. 1 shows in full.

225 Perhaps the most important feature of the RGR-RMF relationship in Fig. 1 is that although in  
226 this case there does happen to be an optimum RMF (RMF = 0.34) associated with a maximal  
227 RGR (RGR = 0.0793) at  $t = 7$ , that is simply a transient point generated by the particular  
228 values assumed for the variables. There is no possibility of the plant somehow adjusting its  
229 RMF to maximise its RGR by returning to those coordinates while preserving the sigmoid

230 trajectories of roots and shoots; it is not an equilibrium towards which a growth trajectory  
231 could converge in any apparently goal-seeking way (Thornley 1998).

232 In the long run the RGR of an individual must decline, although, as Fig. 1 suggests and  
233 experimental evidence (Hunt 1982, pp. 20, 192; Hunt & Lloyd 1987) proves, RGR can  
234 initially increase from zero (or even from negative values) to a maximum before falling  
235 gradually. The cause of this pattern is probably nothing more than a difference in growth rate  
236 between roots and shoots during post-germination development.

237 The full richness of the how RGR and RMF co-vary can be explored by plugging into eqn.  
238 (1) different values of  $r$  and  $Y_{max}$ , but I will defer that until later, after first considering what  
239 happens to a plant when part of it gets eaten.

#### 240 **Taking a big bite of biomass**

241 If the plant whose growth is shown in Fig. 1 is defoliated by allowing a well-trained rabbit to  
242 instantly eat nine-tenths of its shoot biomass at  $t = 50$ , the result is as shown in Fig. 2. Until  $t$   
243  $= 50$ , of course, everything proceeds as before. Afterwards, nothing is the same.

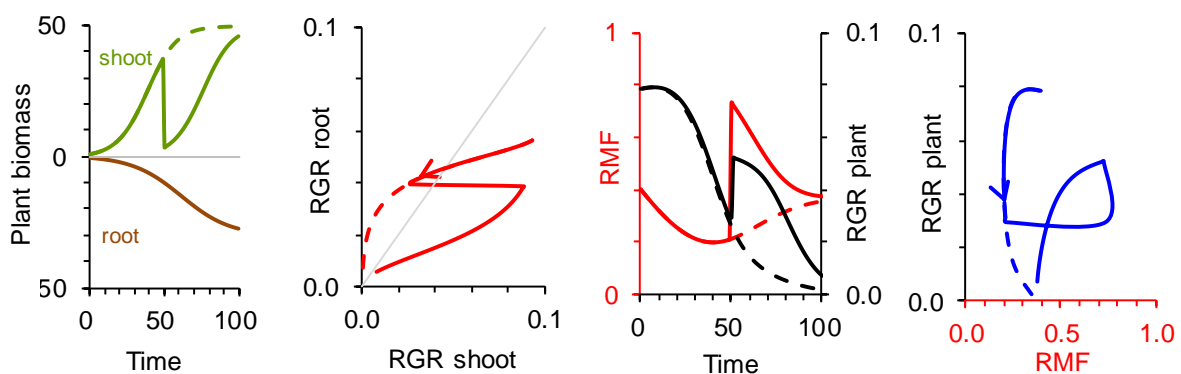

244 Fig. 2. As for Fig.1 but at  $t = 50$ , 90% of shoot biomass is removed in a defoliation event.  $r$  and  $Y_{max}$  values are  
245 the same throughout, as in Fig. 1. For comparison, the trajectories of the undefoliated plant in Fig. 1 are included  
246 here as broken lines.

247 Obviously, when defoliated the plant's RMF shoots upwards from its previously smooth  
248 progression. Eventually, RMF declines back towards where it would have been had the plant  
249 remained intact. Interestingly, so does RGR. For the remainder of the time-course, the RGR  
250 of the defoliated plant comfortably exceeds that of its unmolested counterpart. The latter plant  
251 is, of course, bigger than the former, but it grows more slowly. So, there is a possibility here  
252 for an increase in RMF following defoliation being associated with a temporarily faster RGR  
253 compared with an undefoliated plant. That effect has been seen in some clipping experiments  
254 (for example, van Staalduinen & Anten 2005) but it is not universal, any effect in real plants  
255 depending strongly on context, that is, species, clipping regime and environmental conditions  
256 (Hilbert *et al.* 1981; Coughenour 1991).

257 Conventional physiological wisdom might interpret the post-defoliation increase in RMF in  
258 Fig. 2 as an 'adaptive response' giving a compensatory boost to whole-plant RGR, and the  
259 restoration of an equilibrium implied by the eventual return of root and shoot trajectories  
260 close to where they would have reached anyway. But that interpretation would be wrong.

261 The faster post-defoliation RGR in Fig. 2 is a direct, if temporary, artefact of whole-plant  
262 biomass being smaller after defoliation than before. Because  $RGR = r(1 - Y/Y_{max})$ , a smaller  
263  $Y$  (whole-plant biomass in this case) produces a faster RGR after  $t = 50$  even if  $r$  and  $Y_{max}$   
264 remain constant. Both  $r$  and  $Y_{max}$  are the same before defoliation and after. In that sense, the  
265 plant's growth cannot be said to have 'responded' physiologically to part of it being eaten.  
266 No physiological mechanisms of compensation are needed to explain the plant's growth  
267 dynamics after defoliation.

268 No such mechanism could explain in any case the RGR-RMF co-trajectory shown in Fig. 2.  
269 As bizarre it seems, that trajectory originates directly from the continued unfolding of  
270 sigmoid growth of roots and shoots even when determined by fixed parameter values, and not

271 from any special response to defoliation and certainly not a response that converges towards  
272 anything identifiable as an optimum.

273 However, a real plant well might alter its  $r$  or  $Y_{max}$  values by triggering specific physiological  
274 mechanisms in response to rabbit attack. For example, defoliation can slow root growth  
275 (Wilson 1988), an effect not included in the simulation in Fig. 2 where constant root  $r$  and  
276  $Y_{max}$  are assumed. Slower root growth in a defoliated plant implies, in terms of the sigmoid  
277 growth model, a reduction in root  $r$  or  $Y_{max}$  specifically in response to defoliation. If that  
278 happened the effects on whole-plant RGR illustrated in Fig. 2 could be amplified or  
279 dampened. Fig. 2 shows that specific response mechanisms are not necessary to accelerate  
280 growth post-defoliation, but such responses might occur. How could you tell if they did?

281 One way would be to compare eqn. (1) (or whatever is your preferred model) to plant growth  
282 data with and without defoliation, to test if it is necessary to adjust the equation's parameter  
283 values – that is, of  $r$  and  $Y_{max}$  – to get the best statistical fit. If adjustments in parameter values  
284 are necessary, that would be evidence for a genuine physiological response; if not, not.

### 285 **Responding to reduced nitrogen (or phosphorus, potassium, sulphur...) availability**

286 When an essential nutrient such as nitrogen suffers a reduced availability, the classical theory  
287 says that root growth increases and shoot growth decreases in response. If we simulate this,  
288 what happens?

289 Taking the plant in Fig. 1, at  $t = 25$  flip its root and shoot  $r$  and  $Y_{max}$  values as if its nitrogen  
290 supply was decreased at that time. After  $t = 25$ , root  $r = 0.1$  and  $Y_{max} = 50$ , and shoot  $r = 0.06$   
291 and  $Y_{max} = 30$ , for the purposes of illustration. The result is in Fig. 3 with, again, the  
292 trajectories shown originally in Fig. 1 included for comparison.

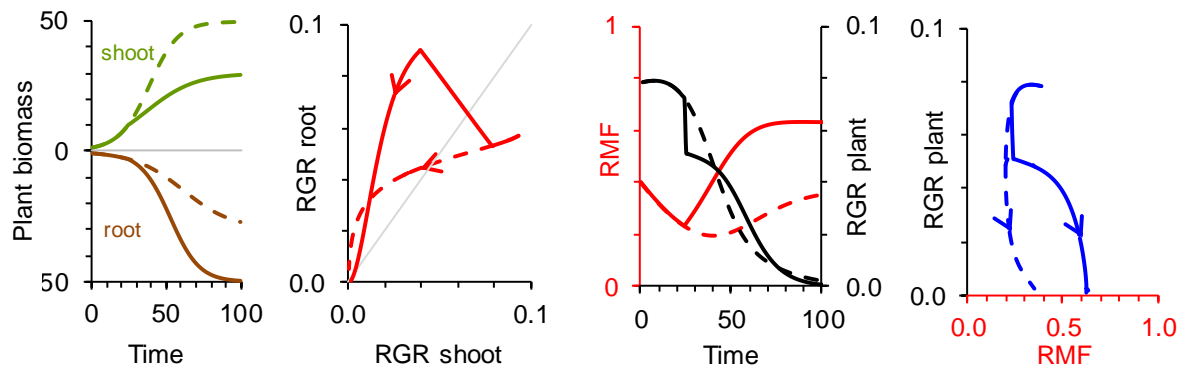

293 Fig. 3. As for Fig.1 but after  $t = 25$ , root  $r = 0.1$  and  $Y_{max} = 50$ , and shoot  $r = 0.06$  and  $Y_{max} = 30$  to simulate the  
294 possible effects of a reduction at  $t = 25$  in the availability of an essential nutrient. For comparison, the  
295 trajectories of the plant in Fig. 1 are shown here as broken lines.

296 By changing the values of root and shoot  $r$  and  $Y_{max}$  in this way, the balance of biomass  
297 production after  $t = 25$  shifts from shoot to root, as the classical theory says it should. In a real  
298 plant the larger root system would then be available to mop up the scarce soil nitrogen to  
299 satisfy the relatively smaller metabolic demands imposed by the shoot. This is the  
300 physiological rationale for of the potential compensatory effect of such a biomass allocation  
301 response to scarcities of nitrogen and other nutrients.

302 Even though the changes in  $r$  and  $Y_{max}$  are instantaneous when in a real plant they would  
303 probably have occurred more gradually, the resulting change in RMF after  $t = 25$  proceeds  
304 smoothly, progressively increasing biomass allocation to the roots. What does this do to  
305 RGR?

306 At  $t = 25$  there is the immediate reduction in RGR that nitrogen deprivation would likely  
307 cause in a real plant. But then RGR rebounds later to exceed, albeit only slightly in this  
308 example, the RGR of the phenotype with fixed  $r$  and  $Y_{max}$  values. Does the dramatic change in  
309 RMF after  $t = 25$  allow RGR to eventually maintain a faster rate than it could otherwise have  
310 done, as expected from the functional equilibrium concept? No, I don't think it does, for the  
311 following reason.

312 The rebound in RGR is explained again by that plant's biomass being smaller than it would  
313 have been without having its root and shoot  $r$  and  $Y_{max}$  values switched. The faster RGR in the  
314 nitrogen-deprived plant after about  $t = 40$  is an artefact of how that quantity is calculated  
315 (eqn. (2)). But what is revealing is that similar whole-plant RGRs can be associated with such  
316 very different RMFs. This suggests that RGR is only weakly dependent on the value of RMF,  
317 contrary to the notion that an optimum biomass allocation is decisive in determining the  
318 whole-plant's growth rate. Why might that be?

319 To answer this question, we need to explore the wider landscape within which RGR and RMF  
320 can co-vary.

### 321 **Filling phenotypic space with plastic plants**

322 How much of the RGR-RMF 'phenotypic space' (Pigliucci 2007), 'phenotypic landscape'  
323 (Williams *et al.* 2013) or 'viable trait space' (McCormack & Iversen 2019) can be occupied?  
324 Do RGR and RMF co-vary in similar ways across that space? And are certain combinations  
325 of RGR and RMF off-limits for a plant whose growth follows a sigmoid trajectory, or are  
326 virtually any combinations of RGR and RMF feasible?

327 To tackle these questions, I varied root and shoot  $r$  and  $Y_{max}$  values as described in the legend  
328 to Fig. 4, keeping them constant throughout, so assuming no malign influences of herbivore  
329 or environment during growth. In other words, by assuming a wider range of  $r$  and  $Y_{max}$   
330 values the RGR-RMF co-trajectory shown already in Fig. 1 is joined by others to see where  
331 and how they occur. The left-hand panel of Fig. 4 shows the result.

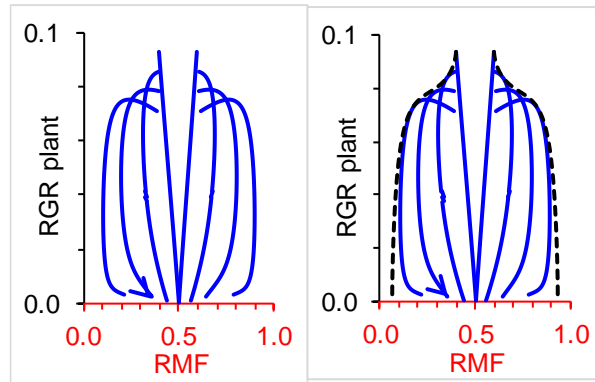

332

333 Fig. 4. Co-trajectories of whole-plant RGR and RMF generated by varying values of  $r$  and  $Y_{max}$  that remain  
 334 constant over time. From left to right in the first panel: root  $r = 0.04$ ,  $Y_{max} = 20$ , shoot  $r = 0.1$ ,  $Y_{max} = 50$ ; root  $r =$   
 335  $0.06$ ,  $Y_{max} = 30$ , shoot  $r = 0.1$ ,  $Y_{max} = 50$  (this, arrowed, is the RGR-RMF co-trajectory shown previously in Fig.  
 336 1); root  $r = 0.08$ ,  $Y_{max} = 40$ , shoot  $r = 0.1$ ,  $Y_{max} = 50$ ; root  $r = 0.1$ ,  $Y_{max} = 50$ , shoot  $r = 0.1$ ,  $Y_{max} = 50$  (this is the  
 337 fourth plot from the left, the linear trajectory generated because  $r$  and  $Y_{max}$  values are the same for roots and  
 338 shoots, which is why it converges eventually on  $RMF = 0.5$ ). Initial root and shoot masses are  $R_0 = 0.8$  and  $S_0 =$   
 339  $1.2$  for all four trajectories. The other four trajectories in the left-hand panel are for plants with initial root and  
 340 shoot masses reversed,  $R_0 = 1.2$  and  $S_0 = 0.8$ , and with  $r$  and  $Y_{max}$  values that mirror those of the first four,  
 341 namely, from left to right: root  $r = 0.1$ ,  $Y_{max} = 50$ , shoot  $r = 0.1$ ,  $Y_{max} = 50$ ; root  $r = 0.1$ ,  $Y_{max} = 50$ , shoot  $r = 0.08$ ,  
 342  $Y_{max} = 40$ ; root  $r = 0.1$ ,  $Y_{max} = 50$ , shoot  $r = 0.06$ ,  $Y_{max} = 30$ ; root  $r = 0.1$ ,  $Y_{max} = 50$ , shoot  $r = 0.04$ ,  $Y_{max} = 20$ .

343 The second panel shows the same eight RGR-RMF co-trajectories as those in the first but superimposed on them  
 344 are two other curves (broken lines) that approximately maximise RGR for a given RMF. The left-hand broken  
 345 curve was generated by fixing shoot  $r = 0.1$  and  $Y_{max} = 200$  throughout, while making root  $Y_{max} = 50$  but root  $r$   
 346 vary at each time step according to  $r_{t+1} = r_t^{1.01}$ . The right-hand broken curve mirrors the first one since it was  
 347 generated by fixing root  $r = 0.1$  and  $Y_{max} = 200$  throughout, while making shoot  $Y_{max} = 50$  but shoot  $r$  vary  
 348 according to  $r_{t+1} = r_t^{1.01}$ .

349 I was surprised to see so much of the RGR-RMF space in Fig. 4 occupied (and, with a  
 350 pleasing resonance, occupied in a vaguely octopodal way). It seems that only fast RGRs  
 351 combined with extreme RMFs are out of bounds. Depending on how the equations are  
 352 parameterised, RGR can vary positively, negatively or hardly at all with RMF.



353 So, it is unsurprising that the relationship between a plant's production and allocation of  
354 biomass has remained so enigmatic, and that experiments yield results difficult to reconcile  
355 with a functional equilibrium. Fig. 4 shows that the same whole-plant RGRs occur in plants  
356 with very different biomass allocations. There is no evidence that certain ranges in RMF are  
357 intrinsically more conducive to promoting faster RGRs than others. If that's true, there can be  
358 no equilibrium or optimum allocations towards which a plant can grow to maximise its  
359 overall growth rate while maintaining a sigmoid growth pattern whatever its  $r$  and  $Y_{max}$  values  
360 might be. This questions the key assumption of the functional equilibrium concept.

361 It is interesting that RGR-RMF trajectories in Fig. 4 cross-over one another in the early stages  
362 of growth. This means that some phenotypes, as defined by fixed  $r$  and  $Y_{max}$  values, could  
363 temporarily out-grow others. But could another phenotype outgrow all the fixed phenotypes  
364 by, for example, varying its  $r$  or  $Y_{max}$  values continually as it grows? At least one phenotype  
365 could.

366 I found this plastic phenotype by trial-and-error. By making shoot  $Y_{max}$  a fixed value of 200  
367 and reducing root  $r$  at each time step from an initial value of 0.1 according to a power  
368 function  $r_{t+1} = r_t^{1.01}$  or, by making root  $Y_{max} = 200$  and reducing shoot  $r$  at each time step  
369 using the same function, the resulting phenotype (the broken curves in Fig. 4) outgrows any  
370 of the fixed phenotypes for any RMF attained by them. The RGR of the plastic phenotype  
371 still declines over time but not as rapidly as in the other phenotypes. (The idea of changing  $r$   
372 continually to simulate plant growth via logistic models was used previously by Wallach &  
373 Gutman (1976). They modelled, with mixed success, biomass production by communities of  
374 winter annuals in arid environments by varying  $r$  not as a direct function of time, but as  
375 arbitrary functions of soil moisture, radiation and temperature.)

376 I use the arbitrary function  $r_{t+1} = r_t^{1.01}$  only to demonstrate that at least one continually plastic  
377 phenotype is possible within this framework that is able to afford some temporary advantage  
378 – in terms of attaining a faster RGR for a given RMF – compared with a fixed phenotype; no  
379 doubt there are other plastic phenotypes described by other functions, but I have not explored  
380 what they might be.

381 Whether that plastic phenotype is physiologically possible is another matter. The extent to  
382 which I had to contrive it into existence on my spreadsheet suggests it's unlikely to be  
383 realistic. But such an improbably plastic phenotype is what would be needed for genuinely  
384 'adaptive' allocation responses to exist in the landscape of opportunity defined by eqns. (1)-  
385 (3). Even so, the possibility of a phenotype capable of continually changing its root and shoot  
386 growth trajectories should not be dismissed entirely when analysing experimental data.

## 387 **Discussion**

388 If the trajectories presented here are valid mathematical metaphors for real plants,  
389 adjustments in root-shoot allocation cannot themselves compensate whole-plant growth rate  
390 for nutrient shortages or defoliation. The possible co-variations between allocation and  
391 growth rate are incompatible with the classical functional equilibrium model.

392 A mistake many of us have made is to think of root-shoot biomass allocation and biomass  
393 production rate as if they are independent traits. We have tried and largely failed to  
394 understand them in those terms. But they are not independent traits. Just as you can't change  
395 the area of a circle without automatically changing its diameter, biomass allocation can't  
396 change without also changing biomass production rate to a greater or lesser extent. This  
397 fundamental misunderstanding is why the metaphorical octopus has taken so long to  
398 handcuff. In some ways this parallels the better-known error of attributing allometric changes  
399 in root and shoot size as genuine allocation responses to the environment (Reich 2002).

400 In plant physiology we are used to thinking of our measured variables changing in  
401 approximately deterministic ways regulated by well-characterised mechanisms. We  
402 understand why the rate of CO<sub>2</sub> fixation varies with irradiance as it does because we can  
403 interpret data with linear models of the essential biochemical and biophysical mechanisms.  
404 We can write a simple linear equation describing concentration-dependent ion uptake rate by  
405 a root. But we can't write a simple linear equation describing how a plant's biomass  
406 production rate depends on how it allocates biomass between roots and shoot because there is  
407 no independent variable in that relationship. The wide spectrum of possible variation between  
408 RGR and RMF in Fig. 4 illustrates this co-dependence, presuming the trajectories in Fig. 4 to  
409 be valid, of course. And the way to test their validity is to do appropriate experiments and  
410 apply eqns. (1)-(3) to the data. This isn't the only example in plant physiology of two  
411 important variables having no unique relationship with one another. A comparable co-  
412 dependency exists between simultaneous rates of CO<sub>2</sub> assimilation and water evaporation via  
413 stomata (Cowan & Farquhar 1977).

414 So, how does plant growth respond to the environment if not primarily by alterations in root-  
415 shoot allocation?

416 A plant's environment is never uniform in space or time. Different sets of meristems of the  
417 same plant can experience different external cues and conditions. Some growth responses to  
418 such an environment do have the potential to be genuinely 'adaptive' in terms of  
419 compensating for resources distributed non-uniformly and perhaps unpredictably in space and  
420 time, or for the partial destruction of biomass. These include localised root proliferation in  
421 transiently nutrient-rich soil (Robinson 1994) and leaf and stem expansion into better  
422 illuminated parts of the canopy (Küppers 1994). As they occur and as they help the plant to  
423 capture scarce resources such responses will almost certainly change differential root or shoot

424 growth rates. If that happens, simultaneous alterations in root-shoot biomass allocation and  
425 whole-plant growth rate will be inevitable if the growth of a real plant is caricatured faithfully  
426 by eqn. (1).

427 The changes in root-shoot allocation will appear as if *they* are the primary responses to the  
428 environment. They, however, are likely to be only secondary consequences of localised,  
429 temporary, and to some extent independent growth responses of roots and shoots to nutrients,  
430 light, herbivory and so on. It is *those* potentially ‘adaptive’ responses that cause root and  
431 shoot growth rates to differ and whole-plant growth rate to change; that’s the illusion that has  
432 been fooling us for so long.

433 But such changes will occur whenever anything – cold, warmth, hard soil, loose soil, anoxia,  
434 toxins, pests, pathogens, trampling, UV radiation, fungicides, and so on – differentially  
435 changes root and shoot growth rates. It is more useful to interpret these changes not so much  
436 as specific responses to those factors, but as unavoidable consequences for the whole plant of  
437 certain of its meristems encountering them. Thinking of a plant not as an entity comprising  
438 two juxtaposed centres of growth (‘roots’ and ‘shoots’), but as populations of dispersed,  
439 multiple meristems that happen to be connected to one another, subsets of which can  
440 experience and respond separately to different local environmental conditions, removes the  
441 need for a functional equilibrium model – or any other model – of ‘adaptive’ root-shoot  
442 behaviour, at least insofar as the relationship between allocation and whole-plant growth is  
443 concerned.

444 It is time to move on from using the functional equilibrium model to explain what changes in  
445 root-shoot allocation mean because (a) it doesn’t really explain much and (b) it’s wrong  
446 anyway. As a metaphor to fill the gaps where experimental data should have been it  
447 stimulated us to think critically about our understanding of allocation and growth, but it has

448 proved a dead-end for advancing that understanding any further. I offer no superior theory to  
449 replace it because none is needed.

450 Instead, to understand the dynamics of root-shoot biomass allocation and whole-plant growth  
451 rate it is better simply to measure root and shoot growth repeatedly and frequently (and not  
452 rely on potentially misleading ‘final harvest’ measurements), apply defined environmental  
453 treatments during growth for comparison with an untreated control so that deviations in  
454 growth or allocation between the two can be followed unambiguously (see Robinson &  
455 Peterkin 2019), and analyse temporal dynamics of allocation, growth and ideally resource  
456 capture (Trinder *et al.* 2013) using a suitable model (not necessarily the logistic but whatever  
457 is most appropriate) to help distinguish genuine responses from consequential changes in  
458 allocation and growth.

459 It is often true in science that ‘The basic problem...is the very common one of the easily  
460 measured variables not being the theoretically important ones’ (Williams 1966, p. 106). Here,  
461 however, the easily measured variables – root and shoot biomasses – *are* the theoretically  
462 important ones. They are measured so easily compared with many others that the potential  
463 richness of the information they contain has remained hidden and their importance  
464 overlooked. Such basic data have been analysed in too restrictive a way to realise their full  
465 explanatory value.

466 The production and allocation of biomass aren’t everything, of course (Kong & Fridley  
467 2019). What really matters is what a plant does with that biomass once produced. How, and  
468 how quickly, leaves and roots take up and use raw materials, how cells metabolise  
469 assimilates, how a plant changes shape as it develops, and how it executes numerous other  
470 processes, are what a real plant does. And in a real plant feedback between roots and shoot  
471 occurs continually, not least in the upward and downward flows of vascular fluids and their

472 contents, the activities of one plant compartment influencing those of the other. Root and  
473 shoot activities are limited also by structural and stoichiometric constraints. What effects  
474 might all these have on my conclusions? My guess is that the net effect of including them  
475 explicitly will be to restrict the occupiable RGR-RMF space in Fig. 4 to a narrower range, but  
476 not to fundamentally alter the general picture. After all, roots and shoots of real plants with all  
477 their feedback mechanisms and constraints still grow sigmoidally, on average, and that's what  
478 the imaginary plants in Fig. 4 are doing, too.

479 All of that applies to understanding the dynamics of allocation and growth in individual  
480 plants as they go through their lives. What about comparisons among species? It is a  
481 biological and mathematical inevitability that no plant's RGR is constant and highly unlikely  
482 that its RMF is either. Even so, in in multi-species screening experiments and meta-analyses  
483 RGR and RMF are averaged over many days or weeks to provide valuable but 'static' indices  
484 of comparative performance. Interspecific comparisons between such indices can produce  
485 puzzling or contradictory correlations between RGR and root-shoot allocation that vary in  
486 both sign and strength (Hunt & Cornelissen 1987). The explanation for this prompted by Fig.  
487 4 is that it depends where different plants happen to be on their dynamic trajectories within  
488 the RGR-RMF landscape at the time(s) of measurement. That whereabouts is usually  
489 unknown and will always be unknown if meta-analyses don't include temporally detailed  
490 data.

491 Is it true that a plant should always maximise its instantaneous growth rate anyway? That  
492 principle is often used as a goal when growth and allocation are modelled whether as isolated  
493 individuals (Thornley 1998) or as competing populations (Vincent & Vincent 1996). Most  
494 plants usually grow faster if allowed and are physiologically able. Whether that behaviour  
495 leads eventually to any fitness benefits in terms of greater seed production or vegetative

496 spread compared with the plant's competitors depends on many factors beyond the horizon of  
497 this paper. Any demographic advantage accruing from individuals maximising their growth  
498 rates is highly context-dependent. It seems reasonable that a faster individual growth rate  
499 relative to a competitor's should be advantageous in the short-term, but there is no direct  
500 evidence for such an advantage. In contrast there is ample evidence for strong long-term  
501 selection against inherently fast growth in hostile habitats. There, plants typically have  
502 evolved primarily to maximise their chances of conserving resources, deterring predators and  
503 pathogens, and protecting meristems inside durable tissues, traits physiologically and  
504 developmentally incompatible with sustained fast growth (Grime 2001, p. 89).

#### 505 **Concluding comments and coda**

- 506 • Sigmoid growth trajectories of roots and shoots, and how these translate into dynamic  
507 changes in biomass allocation and production rates, are incompatible with a functional  
508 equilibrium model.
- 509 • Changes in allocation are caused by differential growth rates between roots and  
510 shoots. Anything that changes root or shoot growth rate will change root-shoot  
511 allocation and will lead unavoidably to a change in whole-plant growth rate.
- 512 • It will often seem as though root-shoot allocation is the primary response to the  
513 environment and so likely 'adaptive', but that is an illusion.
- 514 • Stronger candidates for primary, potentially 'adaptive' growth responses are the  
515 localised and transient productions of roots and leaves in more favourable microsites  
516 within the plant's immediate environment. Those responses entail changes in growth  
517 rate of roots or shoots and that leads automatically to unavoidable changes in root-  
518 shoot allocation and whole-plant growth rate. The latter are secondary consequences  
519 of the primary responses.

- 520       • Biomass allocation and whole-plant growth rate are indivisible processes. They are  
521       not independent traits.
- 522       • Biomass allocation and production rate have no unique relationship to one another but  
523       can vary across a wide spectrum of possible relationships.
- 524       • Changes in root-shoot allocation cannot of themselves compensate directly for an  
525       impairment of growth rate caused by an external factor such as nitrogen shortage;  
526       such changes cannot be ‘adaptive’.

527 I hope by now you are thinking that the examples I used to develop my arguments are  
528 interesting as far as they go but are also asking if my focusing on just those few cases is  
529 entirely legitimate. What about all the others that I haven’t considered? Could they tell a  
530 different story? Rather than present a bestiary of all possible growth and allocation  
531 trajectories here, can I encourage you instead to open a spreadsheet or write some code to  
532 explore first-hand the sometimes surprising dynamics of biomass production and allocation  
533 via eqn. (1) along with eqns. (2) and (3)? (After writing that I remembered that May (1976)  
534 had also urged his readers to play around with eqn. (1) to best appreciate its rich counter-  
535 intuitive dynamics. It was a good suggestion then, and it is now.) Then, suitably inspired, do  
536 the experiments.

## 537 **References**

- 538 **Abramoff RZ, Finzi AC 2015.** Are above- and below-ground phenology in sync? *New Phytologist* **205**:1054-  
539       1061.
- 540 **Brouwer R 1962.** Nutritive influences on the distribution of dry matter in the plant. *Netherlands Journal of*  
541       *Agricultural Science* **10**:399-408.
- 542 **Brown HE, Huth NI, Holzworth DP, Teixeira EI, Wang E, Zyskowski RF, Zheng B 2019.** A generic  
543       approach to modelling, allocation and redistribution of biomass to and from plant organs. *In Silico Plants*  
544       doi:10.1093/insilicoplants/diy004.



- 545 **Chen G, Hobbie SE, Reich PB, Yang Y, Robinson D 2019.** Allometry of fine roots in forest ecosystems.  
546 *Ecology Letters* **22**:322-331.
- 547 **Coughenour MB 1991.** Dwarf shrub and graminoid responses to clipping, nitrogen and water: simplified  
548 simulations of biomass and nitrogen dynamics. *Ecological Modelling* **54**:81-110.
- 549 **Cowan IR, Farquhar GD 1977.** Stomatal function in relation to leaf metabolism and environment. In: Jennings  
550 DH ed. *Integration of activity in the higher plant. Society for Experimental Biology Symposium XXXI*  
551 Cambridge, UK: Cambridge University Press, 471-505.
- 552 **Grime JP 2001.** *Plant strategies, vegetation processes and ecosystem properties.* Chichester, UK: John Wiley  
553 and Sons.
- 554 **Hilbert DW, Swift DM, Detling JK, Dyer MI 1981.** Relative growth rates and the grazing optimization  
555 hypothesis. *Oecologia* **51**:14-18.
- 556 **Hunt R 1982.** *Plant growth curves. The functional approach to plant growth analysis.* London, UK: Edward  
557 Arnold.
- 558 **Hunt R, Cornelissen JHC 1987.** Components of relative growth rate and their interrelations in 59 temperate  
559 plant species. *New Phytologist* **135**:395-417.
- 560 **Hunt R, Lloyd PS 1987.** Growth and partitioning. *New Phytologist* **106** (suppl.):235-249.
- 561 **James C 2012.** *Cultural amnesia.* London, UK: Picador Books.
- 562 **Kong D, Fridley JD 2019.** Does plant biomass partitioning reflect energetic investments in carbon and nutrient  
563 foraging? *Functional Ecology* **33**:1627-1637.
- 564 **Küppers M 1994.** Canopy gaps: competitive light interception and economic space filling – a matter of whole-  
565 plant allocation. In: Caldwell MM, Pearcy RW eds. *Exploitation of environmental heterogeneity by plants.*  
566 Oxford, UK: Blackwell Scientific Publications, 111-144.
- 567 **Makoto K, Wilson SD, Sato TY, Blume-Werry G, Cornelissen JHC 2020.** Synchronous and asynchronous  
568 root and shoot phenology in temperate woody seedlings. *Oikos* **129**: 643-650.
- 569 **May RM 1974a.** Biological populations with nonoverlapping generations: stable points, stable cycles, and  
570 chaos. *Science* **186**:645-647.
- 571 **May RM 1974b.** *Stability and complexity in model ecosystems.* Princeton, USA: Princeton University Press.
- 572 **May RM 1976.** Simple mathematical models with very complicated dynamics. *Nature* **261**:459-467.
- 573 **McConnaughay KDM, Coleman JS 1999.** Biomass allocation in plants: ontogeny or optimality? A test along  
574 three resource gradients. *Ecology* **80**:2581-2593.

- 575 **McCormack ML, Iversen CM 2019.** Physical and functional constraints on viable belowground acquisition  
576 strategies. *Frontiers in Plant Science* 10: doi: 10.3389/fpls.2019.01215.
- 577 **Meyer RC, Weigelt-Fischer K, Knoch D, Heuermann M, Zhao Y, Altmann T 2020.** Temporal dynamics of  
578 QTL effects on vegetative growth in *Arabidopsis thaliana*. *bioRxiv* preprint  
579 doi.org/10.1101/2020.06.11.145953.
- 580 **Pigliucci M 2007.** Finding the way in phenotypic space: the origin and maintenance of constraints on  
581 organismal form. *Annals of Botany* **100**:433-438.
- 582 **Poorter H, Jagodzinski AM, Ruiz-Peinado R, Kuyah S, Luo Y, Oleksyn J, Usoltsev VA, Buckley TN,  
583 Reich PB, Sack L 2015.** How does biomass distribution change with size and differ among species? An  
584 analysis for 1200 plant species from five continents. *New Phytologist* **208**:736-749.
- 585 **Poorter H, Nagel O 2000.** The role of biomass allocation in the growth response of plants to different levels of  
586 light, CO<sub>2</sub>, nutrients and water: a quantitative review. *Australian Journal of Plant Physiology* **27**:595–607.
- 587 **Reich PB 2002.** Root-shoot relations: optimality in acclimation and adaptation or the ‘Emperor’s New Clothes’?  
588 In: Waisel Y, Eshel A, Kafkafi U, eds. *Plant roots: the hidden half*, 3<sup>rd</sup> edition. New York, USA: Marcel  
589 Dekker, 205-220.
- 590 **Robinson D 1994.** The responses of plant to non-uniform supplies of nutrients. *New Phytologist* **127**:635-674.
- 591 **Robinson D, Peterkin JH 2019.** Clothing the emperor: dynamic root–shoot allocation trajectories in relation to  
592 whole-plant growth rate and in response to temperature. *Plants* **8**:212 doi:10.3390/plants8070212.
- 593 **Swift J, Alvarez JM, Arausa V, Gutiérrez RA, Coruzzia GM 2020.** Nutrient dose-responsive transcriptome  
594 changes driven by Michaelis–Menten kinetics underlie plant growth rates. *Proceedings of the National  
595 Academy of Sciences USA* doi/10.1073/pnas.1918619117.
- 596 **Thornley JHM 1998.** Modelling shoot:root relations: the only way forward? *Annals of Botany* **81**:165-171.
- 597 **Trinder CJ, Brooker RW, Robinson D 2013.** Plant ecology's guilty little secret: understanding the dynamics  
598 of plant competition. *Functional Ecology* **27**:918-929.
- 599 **van Staalduinen MA, Anten NPR 2005.** Differences in the compensatory growth of two co-occurring grass  
600 species in relation to water availability. *Oecologia* **146**:190-199.
- 601 **Vincent TLS, Vincent TL 1996.** Using the ESS maximum principle to explore root-shoot allocation,  
602 competition and coexistence. *Journal of Theoretical Biology* **180**:111-120.
- 603 **Wallach D, Gutman M 1976.** Environment-dependent logistic equations applied to natural pasture growth  
604 curves. *Agricultural Meteorology* **16**:389-404.

- 605 **West GB, Brown JH, Enquist BJ 2001.** A general model for ontogenetic growth. *Nature* **413**:628-631.
- 606 **Williams BP, Johnston IG, Covshoff S, Hibberd JM 2013.** Phenotypic landscape inference reveals multiple  
607 evolutionary paths to C4 photosynthesis. *eLife* **2**:e00961. doi:10.7554/eLife.00961.
- 608 **Williams GC 1966.** *Adaptation and natural selection*. Princeton, USA: Princeton University Press.
- 609 **Wilson JB 1988.** A review of evidence on the control of shoot:root ratio, in relation to models. *Annals of Botany*  
610 **61**:433-449.
